# Supplementary material
Source: HighWire-hosted journal article supplement (https://bmjopenquality.bmj.com/highwire/filestream/135957/field_highwire_adjunct_files/0/ds4667.pdf)

Graph to show percentages of patients cognitively assessed over 4 months

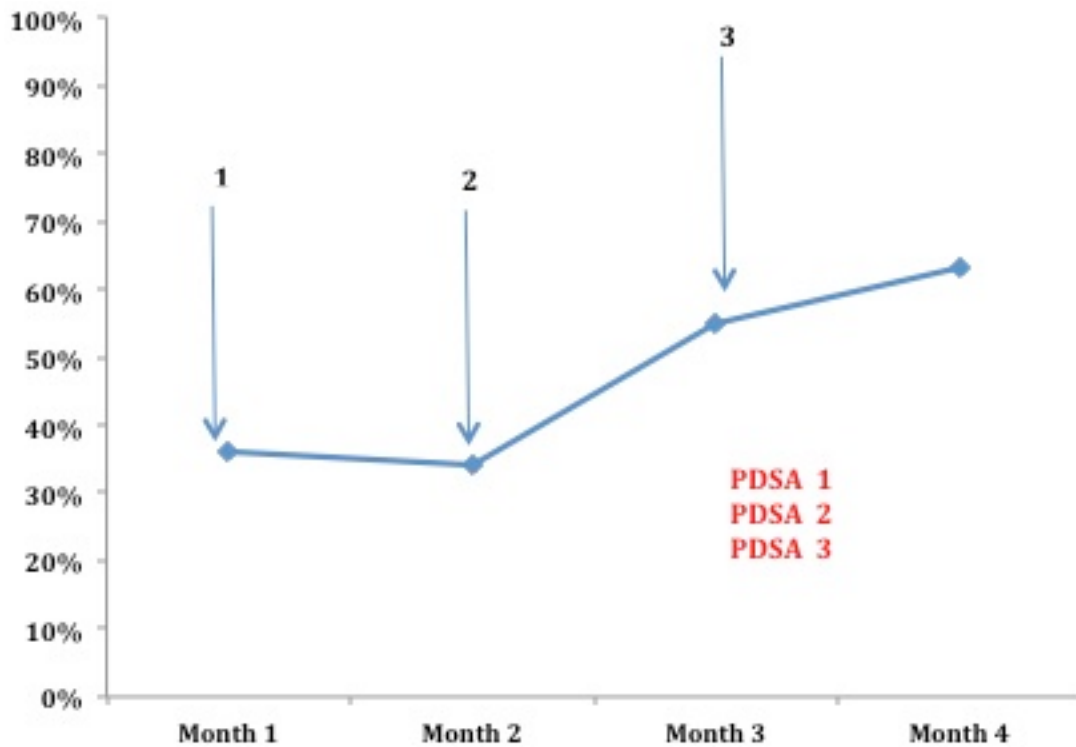

App screenshots

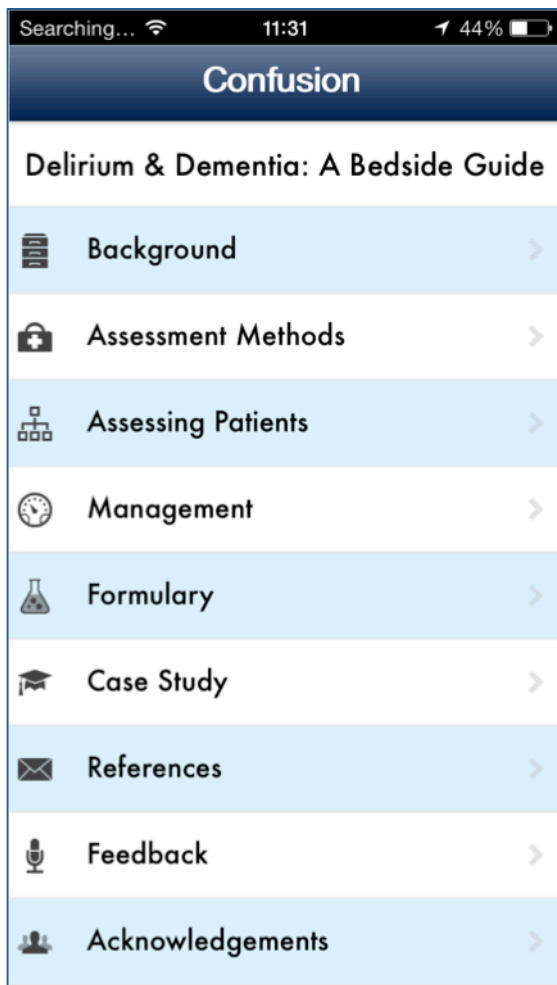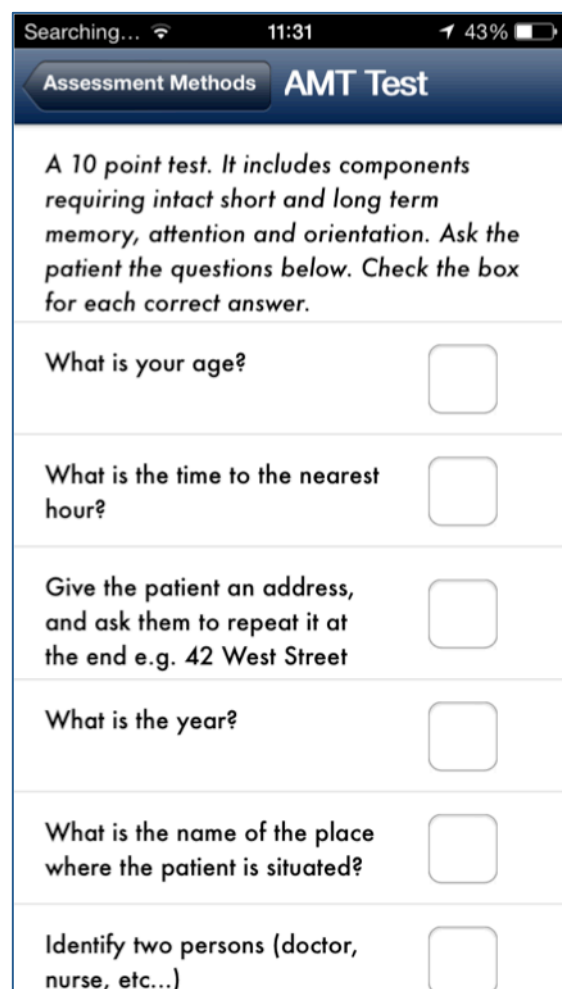

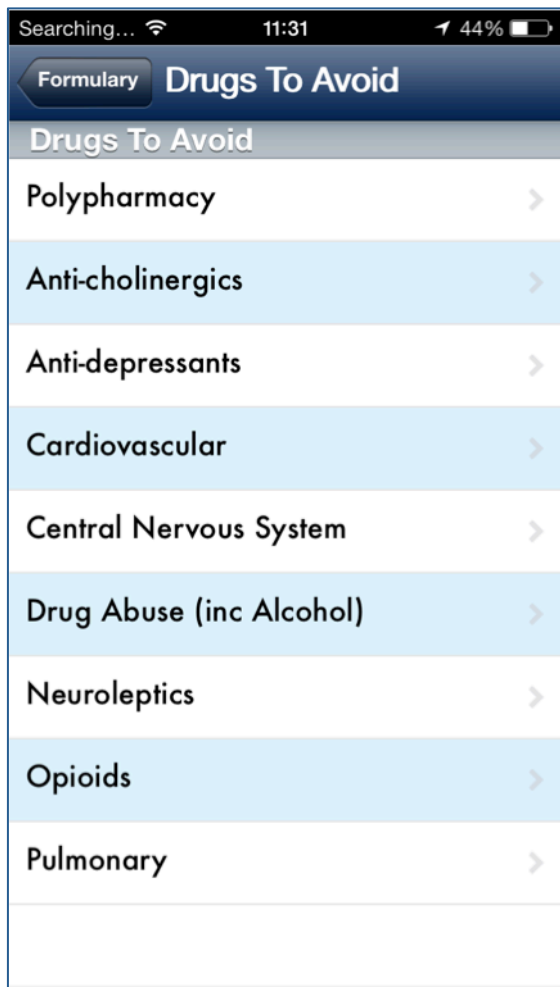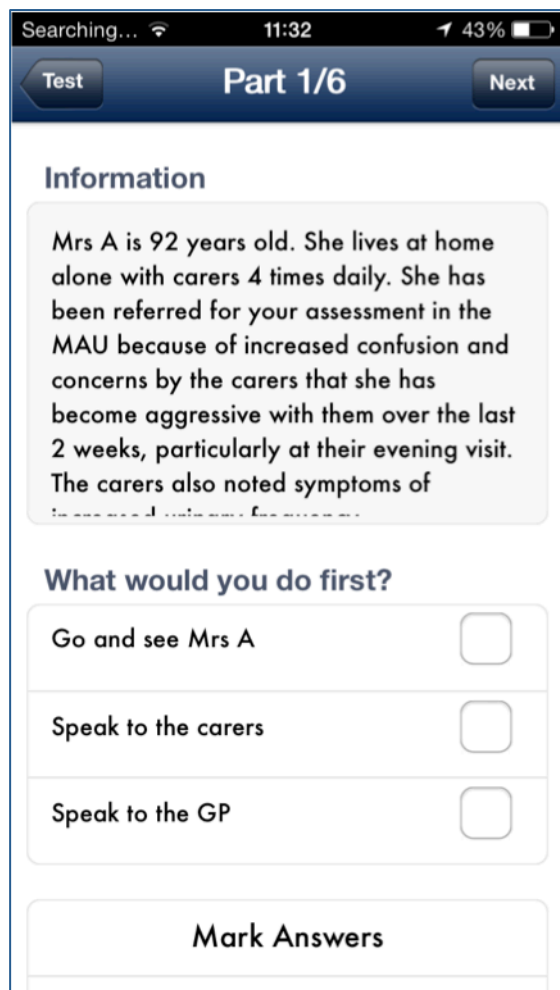

Supplement: ds4667.pdf [file ds4667.pdf]
